# Supplementary material
Source: PubMed Central journal article supplement (PMC3810339)
Supplement: nucl-4-315-s01.pdf [file nucl-4-315-s01.pdf]

## **Supplemental Material to:**

**Baoyuan Bai, Henna M. Moore and Marikki Laiho**

**CRM1 and its ribosome export adaptor NMD3 localize to  
the nucleolus and affect rRNA synthesis**

**Nucleus 2013; 4(4)**

**<http://dx.doi.org/10.4161/nucl.25342>**

**<http://www.landesbioscience.com/journals/nucleus/article/25342/>**

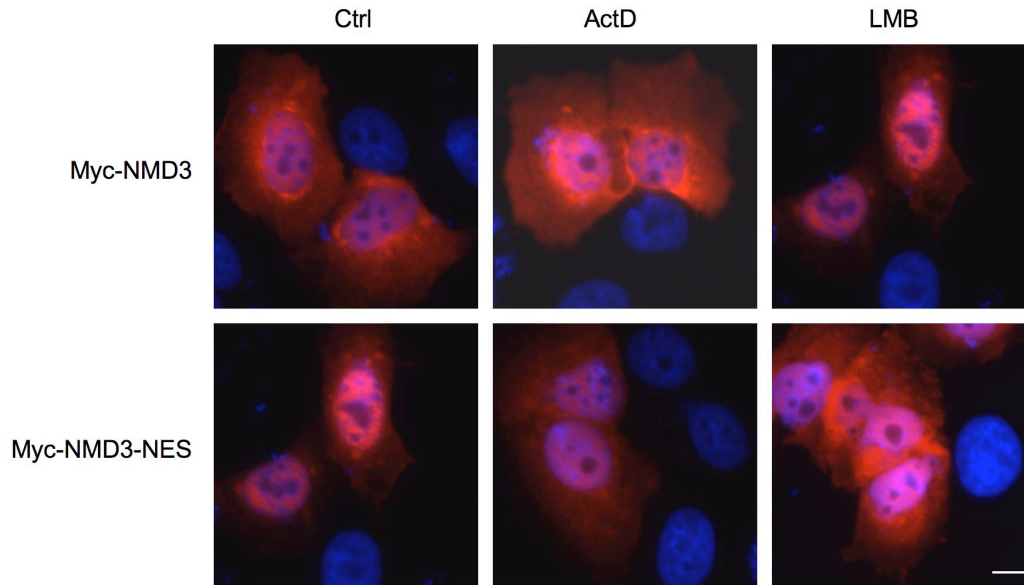

**Figure S1.** Ectopic expression of Myc-NMD3 yields distinct localization phenotypes depending on its expression level. HeLa cells were transfected with Myc-NMD3 expression vector, incubated for 24 hours and treated with LMB or Act D. Cells were fixed followed by detection of Myc-NMD3 expression using Myc-tag antibodies. Cells expressing high levels of Myc-tag are shown. Note nuclear location of Myc-NMD3 in cells treated with LMB, and those of Myc-NMD3-NES cells. Exposure times 35 ms as compared to 482 ms in Figure 1D.

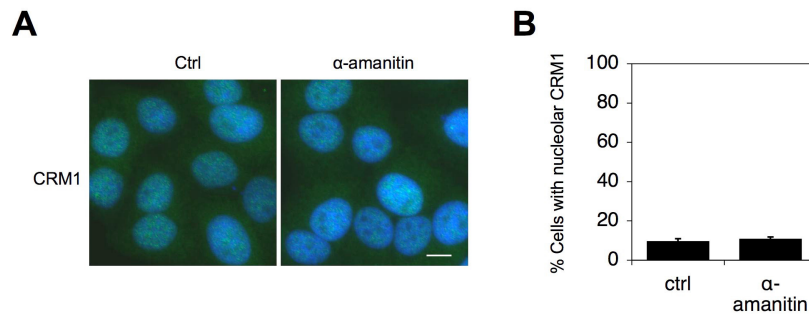

**Figure S2.** Inhibition of Pol II does not affect CRM1 localization. **(A)** HeLa cells were mock-treated or treated with Pol II specific inhibitor  $\alpha$ -amanitin, followed by detection of CRM1 localization by immunofluorescence staining. Scale bar, 10  $\mu$ m. **(B)** Quantification of cells with CRM1 nucleolar accumulation after  $\alpha$ -amanitin treatment in **(A)**. Data represents means  $\pm$  SD, n = 2 experiments.

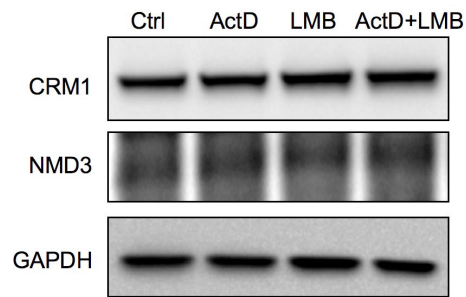

**Figure S3.** Western analysis of cells treated with ActD, LMB or their combination. The membrane was probed with CRM1 and NMD3 antibodies. GAPDH was used as loading control.

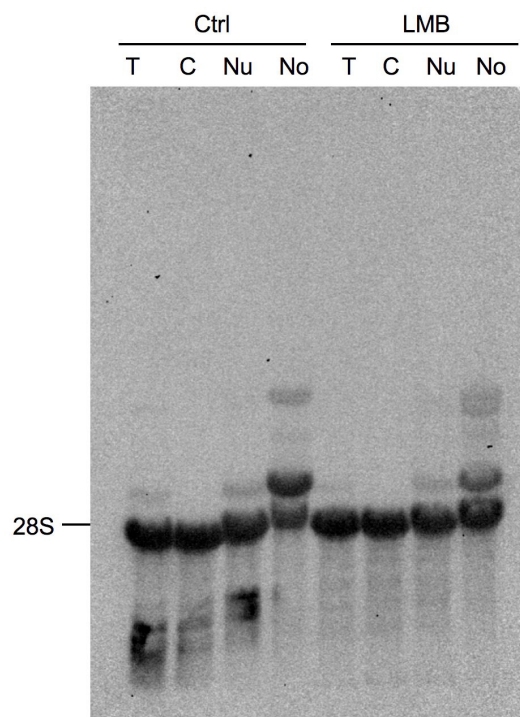

**Figure S4.** Full Image of Northern analysis displayed in Figure 6C.
